# Supplementary material for: Eccrine Porocarcinoma: A Multicenter Retrospective Study with Review of the Literatures Reported in Korea
Source: PubMed Central journal article supplement — Ann Dermatol. 2020 Apr 24;32(3):223–9. doi: 10.5021/ad.2020.32.3.223 (PMC7992626; doi:10.5021/ad.2020.32.3.223), 2020-04-24
Supplement: ad-32-223-s001.pdf [file ad-32-223-s001.pdf]

**Supplementary Table 1.** Clinical characteristics of nine patients with eccrine porocarcinoma from our institutions

| No.* | Sex    | Age (yr) | Location | Size       | Clinical Impression | Recent change         | Duration (yr) | Metastasis work-up imaging study | Management            |
|------|--------|----------|----------|------------|---------------------|-----------------------|---------------|----------------------------------|-----------------------|
| 1    | Male   | 61       | Flank    | 1.5×2.3 cm | Pyogenic granuloma  | Bleeding              | 30            | CT                               | Wide excision (5 mm)  |
| 2    | Male   | 57       | Thumb    | 1.7×1.7 cm | SCC                 | Size growth           | 10            | MRI                              | Wide excision         |
| 3    | Female | 82       | Scalp    | 2.0×2.0 cm | SCC                 | Bleeding, Size growth | 5~6           | None                             | MMS                   |
| 4    | Male   | 47       | Scalp    | 1.5×1.5 cm | Cyst with infection | Size growth           | 6~7           | None                             | Wide excision         |
| 5    | Female | 62       | Palm     | 0.8×0.7 cm | Pyogenic granuloma  | Size growth           | 20            | PET-CT                           | Wide excision (10 mm) |
| 6    | Male   | 74       | Flank    | 1.5×1.5 cm | SCC                 | Size growth           | Congenital    | CT                               | Wide excision (10 mm) |
| 7    | Male   | 40       | Scalp    | 1.8×1.1 cm | Verruca             | Size growth           | 14            | None                             | MMS                   |
| 8    | Female | 78       | Leg      | 4.3×3.4 cm | Eccrine poroma      | Bleeding              | 7~8           | None                             | Wide excision         |
| 9    | Female | 92       | Sole     | 1.3×0.9 cm | Eccrine poroma      | Ulceration            | 5             | PET-CT                           | Wide excision         |

CT: computed tomography, SCC: squamous cell carcinoma, MRI: magnetic resonance imaging, MMS: Mohs micrographic surgery, PET-CT: positron emission tomography-computed tomography. \*Case 2<sup>8</sup>, 3<sup>9</sup> and 6<sup>10</sup> were previously reported in the literature.
