# Supplementary material for: Eccrine Porocarcinoma: A Multicenter Retrospective Study with Review of the Literatures Reported in Korea
Source: PubMed Central journal article supplement — Ann Dermatol. 2020 Apr 24;32(3):223–9. doi: 10.5021/ad.2020.32.3.223 (PMC7992626; doi:10.5021/ad.2020.32.3.223), 2020-04-24
Supplement: ad-32-223-s003.pdf [file ad-32-223-s003.pdf]

**Supplementary Table 2.** Clinical characteristics of 28 eccrine porocarcinoma cases reported in Korea

| No.              | Sex    | Age (yr) | Primary tumor site | Metastasis imaging study | Metastasis  | Management                            | Result                                                                                       | Associated benign lesion |
|------------------|--------|----------|--------------------|--------------------------|-------------|---------------------------------------|----------------------------------------------------------------------------------------------|--------------------------|
| 1 <sup>11</sup>  | Male   | 85       | Cheek              | None                     | N/A         | Wide excision (0.5 cm)                | LN metastasis after 3 months managed with RTx                                                |                          |
| 2 <sup>12</sup>  | Male   | 64       | Knee               | PET-CT                   | None        | Wide excision (2 cm)+LND              | F/U for 2 months                                                                             | Ganglion cyst            |
| 3 <sup>13</sup>  | Male   | 82       | Thigh              | None                     | N/A         | Wide excision (2 cm)                  | F/U loss                                                                                     | Hydroacanthoma simplex   |
| 4 <sup>14</sup>  | Female | 25       | Lip                | None                     | N/A         | Wide excision                         | F/U for 18 months                                                                            |                          |
| 5 <sup>15</sup>  | Female | 85       | Abdomen            | PET-CT                   | None        | Wide excision (1 cm)                  | F/U for 7 months                                                                             |                          |
| 6 <sup>16</sup>  | Female | 79       | Flank              | None                     | N/A         | Refuse to treatment                   | F/U loss                                                                                     |                          |
| 7 <sup>17</sup>  | Male   | 52       | Scalp              | CT                       | None        | Wide excision (2 cm)+RTx              | F/U for 1 month                                                                              |                          |
| 8 <sup>18</sup>  | Female | 63       | Scalp              | None                     | None        | Wide excision+RTx                     | Death after multiple recurrence, LN and distant metastasis, managed with CTx, palliative RTx |                          |
| 9 <sup>19</sup>  | Male   | 44       | Scrotum            | PET-CT, CT               | LN, distant | CTx                                   | Death after sepsis                                                                           |                          |
| 10 <sup>20</sup> | Female | 78       | Thigh              | None                     | N/A         | Wide excision                         | F/U for 6 months                                                                             |                          |
| 11 <sup>21</sup> | Female | 71       | Palm               | PET-CT                   | None        | Wide excision (0.3 cm)                | F/U for 6 months                                                                             |                          |
| 12 <sup>22</sup> | Female | 94       | Back               | None                     | N/A         | Wide excision (2 cm)                  | F/U for 6 months                                                                             |                          |
| 13 <sup>23</sup> | Male   | 75       | Suprapubic         | None                     | N/A         | Wide excision                         | F/U for 6 months                                                                             |                          |
| 14 <sup>24</sup> | Male   | 50       | Palm               | CT, MRI                  | LN, distant | Emergency craniectomy, palliative RTx | Palliative care                                                                              |                          |
| 15 <sup>25</sup> | Male   | 55       | Sole               | None                     | N/A         | Wide excision                         | F/U for 9 months                                                                             |                          |
| 16 <sup>25</sup> | Male   | 54       | Back               | None                     | N/A         | Wide excision                         | N/A                                                                                          |                          |
| 17 <sup>26</sup> | Female | 84       | Eyelid             | CT                       | None        | Wide excision                         | F/U for 6 months                                                                             | Eccrine poroma           |
| 18 <sup>27</sup> | Male   | 68       | Thigh              | PET-CT                   | LN          | Wide excision + LND                   | LN and distant metastasis after 5 months                                                     |                          |
| 19 <sup>28</sup> | Female | 47       | Sole               | CT                       | LN, distant | Palliative care                       | Palliative care                                                                              |                          |
| 20 <sup>29</sup> | Male   | 65       | Abdomen            | None                     | N/A         | Wide excision                         | F/U for 72 months                                                                            | Hydroacanthoma simplex   |
| 21 <sup>30</sup> | Female | 78       | Abdomen            | CT                       | None        | Wide excision (1.5 cm)                | F/U for 6 months                                                                             |                          |
| 22 <sup>31</sup> | Female | 37       | Antihelix          | None                     | N/A         | Wide excision (0.5 cm)                | F/U for 4 months                                                                             | Eccrine poroma           |
| 23 <sup>32</sup> | Female | 71       | Scalp              | CT                       | None        | Wide excision                         | F/U for 6 months                                                                             | Eccrine poroma           |
| 24 <sup>33</sup> | Male   | 69       | Back               | None                     | N/A         | Refuse to treatment                   | F/U loss                                                                                     | Seborrheic keratosis     |
| 25 <sup>34</sup> | Male   | 49       | Scalp              | None                     | N/A         | Wide excision                         | N/A                                                                                          | Eccrine poroma           |
| 26 <sup>35</sup> | Female | 72       | Buttock            | None                     | N/A         | Wide excision                         | F/U for 36 months                                                                            |                          |
| 27 <sup>7</sup>  | Female | 86       | Thigh              | CT                       | LN          | Partial excision+RTx                  | Recurred after 2 months                                                                      | Eccrine poroma           |
| 28 <sup>6</sup>  | Male   | 53       | Abdomen            | MRI                      | LN          | Wide excision+LND+CTx                 | Distant metastasis after 9 years                                                             |                          |

N/A: not available, LN: lymph node, PET-CT: positron emission tomography-computed tomography, LND: LN dissection, F/U: follow-up, RTx: radiation therapy, CTx: chemotherapy, MRI: magnetic resonance imaging.
