# Supplementary figures and images for: Eccrine Porocarcinoma: A Multicenter Retrospective Study with Review of the Literatures Reported in Korea
Source: PubMed Central journal article supplement — Ann Dermatol. 2020 Apr 24;32(3):223–9. doi: 10.5021/ad.2020.32.3.223 (PMC7992626; doi:10.5021/ad.2020.32.3.223), 2020-04-24

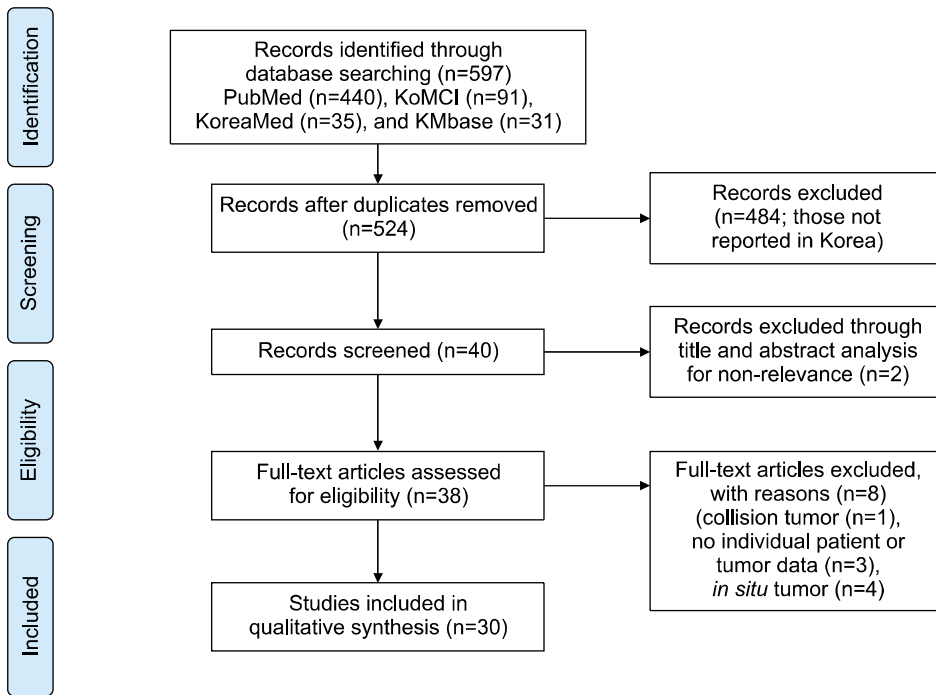

**Supplementary Fig. 1.** Flow diagram of the searching strategy and results.

Supplement: ad-32-223-s002.pdf [file ad-32-223-s002.pdf]
